# Supplementary material
Source: HighWire-hosted journal article supplement (https://ard.bmj.com/content/78/9/1235)
Supplement: inline-supplementary-material-2 [file inline-supplementary-material-2.pdf]

## SUPPLEMENTARY TABLES

### **Association of Epstein-Barr virus serological reactivation with transitioning to systemic lupus erythematosus in at risk individuals**

Neelakshi R. Jog<sup>1</sup>, Kendra A. Young<sup>2</sup>, Melissa E. Munroe<sup>1</sup>, Michael T. Harmon<sup>1</sup>, Joel M. Guthridge<sup>1</sup>, Jennifer A. Kelly<sup>1</sup>, Diane L. Kamen<sup>3</sup>, Gary S. Gilkeson<sup>3</sup>, Michael H. Weisman<sup>4</sup>, David R. Karp<sup>5</sup>, Patrick M. Gaffney<sup>1</sup>, John B. Harley<sup>6,7,8</sup>, Daniel J. Wallace<sup>4</sup>, Jill M. Norris<sup>2</sup>, Judith A. James<sup>1,9</sup>

<sup>1</sup>Arthritis and Clinical Immunology Program, Oklahoma Medical Research Foundation, Oklahoma City, OK, USA

<sup>2</sup>Colorado School of Public Health, University of Colorado Anschutz Medical Campus, Aurora, CO, USA

<sup>3</sup>Department of Medicine, Medical University of South Carolina (MUSC), Charleston, SC, USA

<sup>4</sup>Division of Rheumatology, Cedar-Sinai Medical Center, Los Angeles, CA, USA

<sup>5</sup>Division of Rheumatic Diseases, University of Texas Southwestern Medical Center, Dallas, TX, USA

<sup>6</sup>Center of Autoimmune Genomics and Etiology, Cincinnati Children's Hospital Medical Center, Cincinnati, OH, USA

<sup>7</sup>Department of Pediatrics, University of Cincinnati College of Medicine, Cincinnati, OH, USA

<sup>8</sup>US Department of Veterans Affairs Medical Center, Cincinnati, OH, USA

<sup>9</sup>Departments of Medicine and Pathology, University of Oklahoma Health Science Center, Oklahoma City, OK, USA

**Correspondence:** Judith A. James, MD, PhD, Arthritis and Clinical Immunology, Oklahoma Medical Research Foundation, 825 NE 13<sup>th</sup> Street, Oklahoma City, OK 73104, Phone: 405-271-4987, Fax: (405) 271-7063, Email: [judith-james@omrf.org](mailto:judith-james@omrf.org)

**Short title:** EBV sero-reactivation in lupus transition

**Supplementary Table 1. Increasing VCA IgG levels and EA IgG levels correlate with both increasing number of autoantibodies and ACR criteria**

|                  | <b>Number of AutoAb</b>  | <b>ACR score</b>    |
|------------------|--------------------------|---------------------|
|                  | <b>R (p value)</b>       | <b>R (p value)</b>  |
| VCA IgG OD ratio | <b>0.15 (0.002)</b>      | <b>0.15 (0.002)</b> |
| VCA IgA OD ratio | 0.08 (0.08)              | 0.008 (0.086)       |
| EA IgG OD ratio  | <b>0.22 (&lt;0.0001)</b> | <b>0.15 (0.001)</b> |

**Supplementary Table 2. Significant interactions were found between variants in IL10 and VCA IgA ISR and variants in CD40 and VCA IgG ISR in the risk of transitioning to SLE. <sup>a</sup>**

| Gene | SNP       | Antibody | Transitioned vs.                                               | Transitioned vs.                                          | Non Transition                                                |
|------|-----------|----------|----------------------------------------------------------------|-----------------------------------------------------------|---------------------------------------------------------------|
|      |           |          | Non Transition<br>relatives<br>N=406<br>OR (95% CI)<br>p-value | Unaffected<br>Controls<br>N=167<br>OR (95% CI)<br>p-value | vs. Unaffected<br>Controls<br>N=470<br>OR (95% CI)<br>p-value |
| IL10 | rs3024505 | VCA-IgG  | 0.29                                                           | 0.05                                                      | 0.34                                                          |
| IL10 | rs3024505 | VCA-IgA  | <b>0.01</b>                                                    | <b>0.047</b>                                              | 0.82                                                          |
| IL10 | rs3024505 | EA       | 0.35                                                           | 0.60                                                      | 0.82                                                          |
| IL10 | rs3024495 | VCA-IgG  | 0.35                                                           | 0.05                                                      | 0.24                                                          |
| IL10 | rs3024495 | VCA-IgA  | <b>0.03</b>                                                    | 0.11                                                      | 0.77                                                          |
| IL10 | rs3024495 | EA       | 0.22                                                           | 0.59                                                      | 0.86                                                          |
| IL10 | rs3024493 | VCA-IgG  | 0.22                                                           | <b>0.04</b>                                               | 0.36                                                          |
| IL10 | rs3024493 | VCA-IgA  | <b>0.008</b>                                                   | <b>0.04</b>                                               | 0.81                                                          |
| IL10 | rs3024493 | EA       | 0.18                                                           | 0.40                                                      | 0.66                                                          |
| IL10 | rs1800896 | VCA-IgG  | 0.45                                                           | 0.10                                                      | 0.31                                                          |
| IL10 | rs1800896 | VCA-IgA  | 0.55                                                           | 0.92                                                      | 0.65                                                          |
| IL10 | rs1800896 | EA       | 0.30                                                           | 0.24                                                      | 0.14                                                          |
| IL10 | rs3122605 | VCA-IgG  | 0.05                                                           | 0.12                                                      | 0.63                                                          |
| IL10 | rs3122605 | VCA-IgA  | <b>0.02</b>                                                    | <b>0.005</b>                                              | 0.41                                                          |
| IL10 | rs3122605 | EA       | 0.70                                                           | 0.97                                                      | 0.81                                                          |
| CD40 | rs1569723 | VCA-IgG  | <b>0.01</b>                                                    | <b>0.04</b>                                               | 0.58                                                          |
| CD40 | rs1569723 | VCA-IgA  | 0.16                                                           | 0.69                                                      | 0.40                                                          |

|      |           |         |               |              |      |
|------|-----------|---------|---------------|--------------|------|
| CD40 | rs1569723 | EA      | 0.10          | 0.21         | 0.12 |
| CD40 | rs1883832 | VCA-IgG | <b>0.003</b>  | <b>0.008</b> | 0.84 |
| CD40 | rs1883832 | VCA-IgA | 0.46          | 0.79         | 0.71 |
| CD40 | rs1883832 | EA      | 0.09          | 0.40         | 0.22 |
| CD40 | rs4810485 | VCA-IgG | <b>0.0009</b> | <b>0.01</b>  | 0.48 |
| CD40 | rs4810485 | VCA-IgA | 0.64          | 0.91         | 0.54 |
| CD40 | rs4810485 | EA      | 0.12          | 0.52         | 0.28 |
| CR2  | rs17615   | VCA-IgG | 0.55          | 0.85         | 0.25 |
| CR2  | rs17615   | VCA-IgA | <b>0.03</b>   | 0.06         | 0.83 |
| CR2  | rs17615   | EA      | 0.99          | 0.25         | 0.67 |

<sup>a</sup> Odds Ratio (OR) presented for 1 unit increase in OD ratio
